1 **Root cap cell corpse clearance limits microbial colonization in *Arabidopsis thaliana***

2 Nyasha M. Charura<sup>1+</sup>, Ernesto Llamas<sup>1+</sup>, Concetta De Quattro<sup>1</sup>, David Vilchez<sup>2,3,4</sup>, Moritz  
3 K. Nowack<sup>5,6#</sup> and Alga Zuccaro<sup>1#\*</sup>

4 <sup>1</sup> Cluster of Excellence on Plant Sciences (CEPLAS), Institute for Plant Sciences,  
5 University of Cologne, D-50674 Cologne, Germany.

6 <sup>2</sup> Cologne Excellence Cluster for Cellular Stress Responses in Aging-Associated  
7 Diseases (CECAD), University of Cologne, 50931 Cologne, Germany.

8 <sup>3</sup> Center for Molecular Medicine Cologne (CMMC), University of Cologne, 50931 Cologne,  
9 Germany.

10 <sup>4</sup> Faculty of Medicine, University Hospital Cologne, 50931 Cologne, Germany.

11 <sup>5</sup> Department of Plant Biotechnology and Bioinformatics, Ghent University, 9052 Ghent,  
12 Belgium

13 <sup>6</sup> VIB Center for Plant Systems Biology, 9052 Ghent, Belgium

14 #shared last author

15 +shared first author

16 \*Corresponding author: [azuccaro@uni-koeln.de](mailto:azuccaro@uni-koeln.de)

17

18 **Abstract**

19 Developmental programmed cell death (dPCD) in *Arabidopsis thaliana* is an integral part  
20 of the differentiation process of the root cap, a specialized organ surrounding  
21 meristematic stem cells. dPCD in lateral root cap (LRC) cells depends on the transcription  
22 factor ANAC033/SOMBRERO (SMB) and is followed by rapid cell-autonomous corpse  
23 clearance, involving the senescence-associated nuclease BFN1 downstream of SMB.  
24 Based on transcriptomic analyses, we observed the downregulation of *BFN1* during  
25 colonization of *A. thaliana* by the beneficial root endophyte *Serendipita indica*. Roots of  
26 *smb3* mutants, deficient in root cap dPCD and corpse clearance, are covered by  
27 uncleared LRC cell corpses and hypercolonized by *S. indica* from the root tip upwards.  
28 The *bfn1-1* mutant exhibits an attenuated delayed corpse clearance phenotype, but still  
29 enhances colonization by *S. indica*. These results highlight that the constant production

30 and clearance of LRC cells, in addition to its function in root cap size control, represents  
31 a sophisticated physical defense mechanism to prevent microbial colonization in close  
32 proximity to meristematic stem cells. Furthermore, we propose a mechanism by which *S.*  
33 *indica* manipulates dPCD in *A. thaliana* roots by downregulating *BFN1* to promote fungal  
34 colonization through delayed clearance of dead cells, which present potential sources of  
35 nutrients.

## 36 **Keywords**

37 Programmed cell death (PCD) / developmental PCD (dPCD) / root cap / lateral root cap  
38 (LRC) / SOMBRERO (SMB) / plant-microbe interaction / root colonization / *Serendipita*  
39 *indica* / root cell corpses / root stem cells / BFN1

## 40 **Introduction**

41 Plant roots elongate by producing new cells in the meristematic tissue at the apical region  
42 of root tips. As roots extend further into the soil environment, the newly formed root tissue  
43 is naturally exposed to microbial attacks, which poses a challenge to the successful  
44 establishment of root systems. However, microbial colonization of the meristematic zone  
45 in root tips is rarely detected (Deshmukh *et al.*, 2006, Jacobs *et al.*, 2011). The sensitive  
46 tissue of the apical root meristem is surrounded by the root cap, a specialized root organ  
47 that orchestrates root architecture, directs root growth based on gravitropism and  
48 hydrotropism, and senses environmental stimuli (Kumpf & Nowack, 2015, Moriwaki *et al.*,  
49 2013). In addition, the root cap is presumed to have a protective function in the exploration  
50 of the soil by the roots (Kumpf & Nowack, 2015, Moriwaki *et al.*, 2013).

51 In *Arabidopsis thaliana* (hereafter *Arabidopsis*), the root cap consists of two distinct  
52 tissues: the centrally located columella root cap at the very root tip and the peripherally  
53 located lateral root cap (LRC), which flanks both the columella and the entire root  
54 meristem (Dolan *et al.*, 1993). A ring of specific stem cells continuously generates both  
55 new LRC cells and root epidermis cells (Dolan *et al.*, 1993). However, despite the  
56 constant production of LRC cells, the root cap itself does not grow in size but matches  
57 the size of the meristem (Fendrych *et al.*, 2014, Barlow, 2002, Kumpf & Nowack, 2015).  
58 To maintain size homeostasis, root cap development is a highly regulated process that

59 varies in different plant species. In *Arabidopsis*, a combination of developmental  
60 programmed cell death (dPCD) and shedding of old cells into the rhizosphere has been  
61 described (Bennett *et al.*, 2010, Kumpf & Nowack, 2015). The centrally located columella  
62 root cap is shed as a cell package into the rhizosphere along with adjacent proximal LRC  
63 cells, followed by a PCD process happening in the rhizosphere (Shi *et al.*, 2018, Feng *et*  
64 *al.*, 2022, Huysmans *et al.*, 2018). In contrast, LRC cells in the upper part of the root tip  
65 elongate and reach the distal edge of the meristem where they undergo dPCD  
66 orchestrated by the root cap-specific transcription factor ANAC33/SOMBRERO (SMB)  
67 (Fendrych *et al.*, 2014, Willemsen *et al.*, 2008, Bennett *et al.*, 2010). SMB belongs to a  
68 plant-specific family of transcription factors carrying a NAC domain (NAM - no apical  
69 meristem; ATAF1 and -2, and CUC2 - cup-shaped cotyledon). In the root cap, SMB  
70 promotes the expression of genes involved in the initiation and execution of LRC cell  
71 death, including the senescence-associated, bifunctional nuclease *BFN1* (Huysmans *et*  
72 *al.*, 2018). *BFN1* is compartmentalized in the ER and released into the cytoplasm during  
73 dPCD to exert its enzymatic activity on nucleic acids in dying cells (Reza *et al.*, 2018,  
74 Fendrych *et al.*, 2014). Cytosolic and nuclear DNA and RNA fragmentation, as part of a  
75 rapid cell-autonomous corpse clearance on the root surface, is delayed in *bfn1-1* loss-of-  
76 function mutants (Fendrych *et al.*, 2014). Precise timing of cell death and elimination of  
77 LRC cells before they fully enter the root elongation zone is essential for maintaining root  
78 cap size and optimal root growth (Fendrych *et al.*, 2014). Loss of SMB activity results in  
79 a delayed cell death, causing LRC cells to enter the elongation zone where they  
80 eventually die without expression of dPCD-associated genes in the root cap, such as  
81 *BFN1* and *PASPA3* (Olvera-Carrillo *et al.*, 2015). Interestingly, the aberrant cell death of  
82 LRC cells in the elongation zone of *smb3* mutants is not followed by corpse clearance,  
83 resulting in an accumulation of uncleared cell corpses along the entire root surface  
84 (Fendrych *et al.*, 2014).

85 Despite its importance in root morphology and plant development, little is known about  
86 the impact of impaired dPCD in the root cap on plant-microbe interactions. To address  
87 the link between fungal accommodation and plant developmental cell death, we analyzed  
88 transcriptomic data and observed downregulation of *BFN1* in *Arabidopsis* during  
89 colonization by *Serendipita indica*, a beneficial fungus of the order Sebaciales. As a root

90 endophyte, *S. indica* colonizes the epidermal and cortex layers of a broad range of  
91 different plant hosts, conferring various beneficial effects, including plant growth  
92 promotion, protection against pathogenic microbes and increased tolerance to abiotic  
93 stresses (Boorboori & Zhang, 2022, Mahdi *et al.*, 2022, Fesel & Zuccaro, 2016). The  
94 colonization strategy of *S. indica* comprises an initial biotrophic interaction between plant  
95 and fungus. Once established in its plant host, *S. indica* enters a growth phase associated  
96 with a restricted host cell death that does not, however, diminish the beneficial effects on  
97 the plant host. The induction of restricted cell death in the epidermal and cortex layers of  
98 roots is a crucial component of the colonization strategy of *S. indica* and is accompanied  
99 by increased production of fungal hydrolytic enzymes (Zuccaro *et al.*, 2011, Deshmukh  
100 *et al.*, 2006). Although several effector proteins involved in fungal accommodation have  
101 been described (Dunken *et al.*, 2022, Weiss *et al.*, 2016), the exact mechanism by which  
102 *S. indica* manipulates cell death in plants is still unclear.

103 Here we show that the bifunctional nuclease *BFN1*, involved in dPCD processes including  
104 LRC corpse clearance, is downregulated in Arabidopsis roots during colonization by *S.*  
105 *indica*, which led us to investigate loss-of-function mutants of *BFN1* and its upstream  
106 transcriptional regulator *SMB*. *smb3* mutant plants accumulate uncleared LRC cell  
107 corpses, which surround the root and enhance *S. indica* attachment and colonization  
108 along the entire root axis, even in the root tip where colonization does not normally occur  
109 in wild-type (WT) plants. Furthermore, we show that *S. indica* clears dead LRC cells of  
110 *smb3* mutant plants, most likely by degradation and uptake of nutrients from the cell  
111 corpses. Similarly, we observe that the *bfn1-1* mutants also enhance fungal colonization,  
112 despite a less pronounced delayed corpse clearance phenotype and accumulation of  
113 undegraded cells. Both mutants are characterized by the accumulation of protein  
114 aggregates in dead and dying cells. Taken together, our data demonstrate that tight  
115 regulation of host dPCD and rapid and complete root cap clearance play important roles  
116 in restricting fungal colonization. Manipulation of dPCD by downregulating *BFN1* during  
117 colonization may therefore provide a means to enhance fungal accommodation and  
118 nutrient availability to the fungus.

## 119 **Results**

120 **BFN1, a downstream component of dPCD involved in cell corpse clearance, is**  
121 **downregulated during interaction with *S. indica***

122 dPCD is the final step of LRC differentiation to maintain root cap organ size in the root tip  
123 of Arabidopsis. This process is orchestrated by the transcription factor SMB and executed  
124 by its direct and indirect downstream targets, including the nuclease BFN1. To explore  
125 the role of root dPCD during *S. indica* accommodation in Arabidopsis, we performed  
126 transcriptional analyses to track changes in the expression profile of cell death marker  
127 genes during different colonization stages. The major regulator of LRC cell death, the  
128 transcription factor *SMB*, showed no changes in expression during fungal colonization  
129 (**Fig. 1A, B**). However, a marked decrease in the expression of the senescence-  
130 associated nuclease *BFN1* was observed at 6 days post inoculation (dpi), a time point  
131 that correlates with the onset of cell death by *S. indica* in Arabidopsis (**Fig. 1A, B**). To  
132 validate the RNA-Seq analysis, we performed quantitative real time-PCR (qRT-PCR),  
133 confirming *BFN1* downregulation at the onset of cell death in *S. indica*-colonized plants  
134 (**Fig. 1C**).

135 Induction of dPCD triggers the release of BFN1 from the ER into the cytoplasm, where  
136 irreversible fragmentation of cytosolic and nuclear DNA and RNA occurs as part of the  
137 clearing of cell corpses (Fendrych et al., 2014). It has previously been shown that the  
138 roots of the *bfn1-1* T-DNA insertion KO mutant line exhibit delayed nuclear degradation  
139 during corpse clearance (Fendrych et al., 2014, Huysmans et al., 2018) (**Fig. 1D**).  
140 Accordingly, staining with Evans blue, a viability dye that penetrates non-viable and  
141 damaged cells (Vijayaraghavareddy et al., 2017), showed an increase in cellular  
142 remnants on the *bfn1-1* epidermal cell layer at the transition between the elongation and  
143 differentiation zones (**Fig. 1E, F and Fig. S8**). These results are consistent with the  
144 proposed involvement of BFN1 in cell corpse clearance during dPCD in the Arabidopsis  
145 root cap.

146 We further characterized the *bfn1-1* mutant with Proteostat, a fluorescent dye that binds  
147 to quaternary protein structures typically found in misfolded and aggregated proteins  
148 (Llamas et al., 2021). In WT root tips, we have previously observed that protein  
149 aggregates accumulate during root differentiation in dying and sloughed columella cell

150 packages but not in young LRC and meristematic cells or healthy differentiated cells  
151 (Llamas et al., 2021). While the roots of WT Arabidopsis plants were devoid of Proteostat  
152 signal, the *bfn1-1* mutant exhibited staining along the root axis, starting at the transition  
153 between elongation and differentiation zone. The meristematic root tip zone remained  
154 free of the Proteostat signal and thus free from misfolded proteins and protein aggregates  
155 (**Fig. 1G, H and Fig. S1**). These data suggest that the lack of BFN1 activity affects protein  
156 homeostasis (proteostasis) and folding in Arabidopsis roots.

157 To investigate the role of BFN1 in *S. indica* root colonization, we quantified extraradical  
158 colonization of *S. indica*-inoculated *bfn1-1* and WT seedlings by comparing the staining  
159 intensities of the chitin-binding fluorescent marker Alexa Fluor 488 conjugated to Wheat  
160 Germ Agglutinin (WGA-AF 488). The *bfn1-1* mutant exhibited significantly stronger  
161 staining, indicating higher extraradical colonization than in WT Arabidopsis. (**Fig. 2A-C**  
162 **and Fig. S2**). Quantification of intraradical colonization by qRT-PCR after careful removal  
163 of outer fungal hyphae, showed increased *S. indica* colonization in the *bfn1-1* mutant at  
164 later stages of interaction (**Fig. 2D**). Together, these results suggest that downregulation  
165 of *BFN1* during colonization is beneficial for intra- and extraradical fungal  
166 accommodation.

### 167 **SMB is involved in restricting fungal colonization**

168 To better characterize the role of disrupted dPCD in Arabidopsis LRCs, we analyzed the  
169 effect of a loss-of-function mutation in the transcription factor SMB, a key element of LRC  
170 differentiation and upstream regulator of BFN1 (**Fig. 1D**). The extent of cell death in the  
171 *smb3* T-DNA insertion line could be visualized with Evans blue staining, which highlighted  
172 the presence of uncleared LRC cell corpses along the entire surface of *smb3* roots,  
173 starting right after the meristematic zone (**Fig. 3A, B and Fig. S4**). Proteostat staining  
174 revealed an accumulation of misfolded and aggregated proteins in the uncleared dead  
175 LRC cells adhering to the roots of *smb3* (**Fig. 3C, D, E**). However, neither Proteostat  
176 signal nor Evans blue staining was detected in young LRC cells covering the meristem or  
177 in cells beneath the uncleared dead LRC cells (**Fig. 3 C, D, E and Fig. S4**). Filter trap  
178 analyses confirmed that more protein aggregates were present in *smb3* roots compared

179 to WT roots (**Fig. 3F**). These data suggest that the accumulation of protein aggregates in  
180 *smb3* LRC cell corpses occurs when they unintentionally enter the elongation zone.

181 To assess extracellular fungal colonization, we quantified WGA-AF 488 signal in *S.*  
182 *indica*-inoculated *smb3* and WT seedlings. *S. indica* showed a preferential colonization  
183 of the differentiation zone of WT roots and exhibited a significant increase in fungal growth  
184 on *smb3* roots along the entire root axis (**Fig. 4A, B**). Interestingly, *S. indica* also grew  
185 around the root tip of *smb3* seedlings, colonizing the meristematic zone of the root apex  
186 (**Fig. 4A and 5A**), a region normally not associated with microbial colonization  
187 (Deshmukh et al., 2006, Jacobs et al., 2011). The intraradical biomass of *S. indica* was  
188 also consistently increased in *smb3* compared to WT roots (**Fig. 4C**). Cytological analysis  
189 by confocal laser scanning microscopy (CLSM) confirmed that *S. indica* does not colonize  
190 the root tip of WT plants, but preferentially colonizes the mature parts of the root,  
191 corresponding to the differentiation zone (**Fig. 5A, C**). We also observed that *S. indica*  
192 accommodates in cells that are subject to cell death and protein aggregation (**Fig. 5**).  
193 Thus, these data indicate that uncleared LRC cell corpses in *smb3* appear to function like  
194 a scaffold for fungal colonization even at the root tip and that continuous clearance of root  
195 cap cells is likely a mechanism to prevent microbial colonization of the root tip.

196 To assess whether *S. indica* is able to digest the accumulating root cap cell corpses in  
197 the *smb3* mutant, we compared Evans blue staining for cell death detection of colonized  
198 and uncolonized roots. While mock-inoculated *smb3* roots displayed an accumulation of  
199 Evans blue stained LRC cell corpses, *smb3* roots colonized with *S. indica* were cleared  
200 of the excess dead LRC cells (**Fig. 5F and Fig. S9**). These results indicate that the  
201 surplus of cell corpses in *smb3* promotes colonization by *S. indica*.

## 202 **Cell non-autonomous activation of cell death by *S. indica***

203 In Arabidopsis WT roots, dPCD execution and corpse clearance orchestrated by the  
204 transcription factor SMB and the nuclease BFN1 prevents unintended accumulation of  
205 LRC cell corpses upstream of the meristem (Fendrych et al., 2014). Based on the  
206 observation that *S. indica* downregulates *BFN1*, we hypothesized that such  
207 downregulation leads to a reduced rate of cell corpse clearance in WT roots, which  
208 positively affects *S. indica* by serving as potential additional sources of nutrients. To test

209 this hypothesis, we performed cell death analyses with WT Arabidopsis roots inoculated  
210 with *S. indica*. Evans blue staining revealed a pattern of dead cells originating at the onset  
211 of the differentiation zone, similar to the *bfn1-1* cell death phenotype (**Fig. 6A, B**). These  
212 results suggest an intrinsic activation of cell death by *S. indica* in this part of the root.  
213 Interestingly, we noticed further similarities between the phenotype of the *bfn1-1* mutant  
214 and WT roots colonized by *S. indica*. Measurements of root length from the tip to the first  
215 hairs highlighted that the elongation zone is shorter upon *S. indica* colonization than in  
216 mock WT roots (**Fig. 6C and Fig. S6, S8**). Moreover, Proteostat staining in *S. indica*-  
217 colonized roots occurred along the entire root axis, starting from the onset of the  
218 differentiation zone, as we observed in *bfn1-1* (**Fig. 6D and Fig. S1, S3**). Our results  
219 suggest that *S. indica* affects dPCD by reducing proteostasis and LRC clearance in  
220 Arabidopsis root caps in a non-cell autonomous manner.

221 To determine whether other beneficial microbes affect dPCD by downregulating *BFN1*,  
222 we analyzed the transcriptional response of Arabidopsis roots colonized by *S. vermifera*,  
223 an orchid mycorrhizal fungus closely related to *S. indica*, and two bacterial synthetic  
224 communities (SynComs) isolated from Arabidopsis or *Hordeum vulgare* (Mahdi et al.,  
225 2022). *BFN1* levels were reduced in Arabidopsis roots during all three microbial  
226 interactions (**Fig. 7**). Furthermore, similar to *S. indica*, the interaction of *S. vermifera* with  
227 Arabidopsis led to an induction of cell death in the differentiated root tissues and to a  
228 shorter elongation zone (**Fig. S5, S7**). These results suggest that beneficial microbes may  
229 have evolved the ability to manipulate dPCD and root cap turnover to increase symbiotic  
230 colonization (**Fig. 8**).

## 231 **Discussion**

### 232 **Impaired dPCD affects plant-microbe interactions**

233 Developmental cell death in plants and animals is a process critical for differentiation and  
234 homeostasis. As new tissue grows, old tissue must be disposed of to maintain healthy  
235 homeostasis at cellular and systemic levels. Examples of dPCD in plants can be found in  
236 xylem development, where controlled cell death forms cavities for water transport or in  
237 lateral root formation, which is facilitated by restricted cell death in cell layers above  
238 developing root primordia (Escamez *et al.*, 2020, Heo *et al.*, 2017). As a plant organ that



239 continuously produces new tissues but maintains a fixed size, the root cap is  
240 characterized by high cellular turnover (Kumpf and Nowack, 2015). Such cellular turnover  
241 in LRCs of Arabidopsis roots is controlled by the transcription factor SMB and  
242 downstream by the nuclease BFN1 (Fendrych et al., 2014). Despite its importance in plant  
243 health and development, little attention has been paid to the influence of dPCD on  
244 accommodation of microbes and *vice versa*.

245 In this study, we investigated the functional link between dPCD processes and microbial  
246 accommodation by characterizing *smb3* and *bfn1-1* Arabidopsis mutants during fungal  
247 interaction. We found that interference with dPCD and corpse clearance in the root cap,  
248 has implications for the entire root system, with some nuanced differences. While *smb3*  
249 roots are sheathed with uncleared dead LRC cells starting from the elongation zone, the  
250 epidermal cell layer beneath does not seem to be affected (**Fig. S4**). In *bfn1-1* roots we  
251 observed dead cells at the onset of the differentiation zone. Here, it remains unclear  
252 whether these cells originate from the root cap or are epidermal cells (**Fig. 1E, F and 3A,**  
253 **B**). Both *smb3* and *bfn1-1* mutations are characterized by increased protein misfolding  
254 and aggregation. However, while the presence of protein aggregates in *smb3* is clearly  
255 restricted to dead LRC cells and correlates with Evans blue staining, the epidermal cell  
256 layer of *bfn1-1* is littered with misfolded proteins and aggregates along the root axis  
257 starting from the differentiation zone, regardless of the occurrence of cell death. These  
258 data suggest that in the root of Arabidopsis, BFN1 activity is not limited to its proposed  
259 function in eliminating LRC cell corpses, but has potential ties to cellular stress signaling  
260 and cell death in the differentiation zone. It was recently demonstrated that small active  
261 metabolites can modulate cell death (Yu *et al.*, 2022). In plants, the Toll/interleukin-1  
262 receptor (TIR) domains of nucleotide-binding leucine rich repeat (NLR) immunoreceptors  
263 possess NADase enzymatic activity, as well as 2',3'-cAMP/cGMP synthetases activity by  
264 hydrolyzing RNA/DNA (Duxbury *et al.*, 2020, Yu *et al.*, 2022). While NADase activity is  
265 not sufficient to induce plant immune responses, mutations that specifically disrupt  
266 synthetase activity abolish TIR-mediated cell death in *Nicotiana benthamiana*,  
267 demonstrating that cNMPs (cyclic nucleotide monophosphates) play an important role in  
268 TIR immune signaling. Also it was shown that the combined activity of two fungal  
269 apoplastic enzymes, the ecto-5'-nucleotidase E5NT and the nuclease NucA from *S.*

270 *indica*, leads to the production of deoxyadenosine (dAdo), a metabolite that, upon uptake,  
271 triggers a TIR-NLR-modulated plant cell death (Dunken et al., 2022). These results  
272 suggest that the DNase activity of BFN1 may be involved in the production of small active  
273 metabolites in the plant that might affect, on different levels, cell death, proteostasis and  
274 plant-microbe interactions. Differential modulation of potential infochemicals in the *bfn1-*  
275 *1* mutant could therefore delay cellular damage signaling and cause protein misfolding  
276 and aggregation, a hypothesis that should be further analyzed by metabolomic and  
277 proteomic approaches.

278 To investigate the role of dPCD in the root cap during interaction with plant microbes, we  
279 assayed intra- and extraradical colonization with the endophytic fungus *S. indica* in *bfn1-*  
280 *1* and *smb3* mutants (**Fig. 2 and 4**). Both approaches show that attenuation or loss of  
281 corpse clearance in the root cap increases fungal colonization. Based on the observation  
282 that *S. indica* is able to clear the LRC cell corpses on *smb3* roots, it is conceivable that  
283 the uncleared LRC cells provide an additional source of nutrients that promote overall  
284 fungal growth. Whether production of the above-described dAdo by *S. indica* potentially  
285 influences dPCD remains to be tested.

286 In WT plants, the root tip is usually free of microbial colonization (Deshmukh et al., 2006,  
287 Jacobs et al., 2011). Interestingly, we detected significant fungal colonization around the  
288 root tip of *smb3*, but not *bfn1-1* or WT plants. Cytological analyses have shown that *S.*  
289 *indica* grows in detached, dead cell packages of LRC and columella cells, but rarely in  
290 WT root tips (Dunken et al., 2022, Deshmukh et al., 2006). The phenotype of *smb3* shows  
291 resemblance to the human skin disease hyperkeratosis. In healthy human skin, a pool of  
292 stem cells produces layers of cells that divide, differentiate, die, and are shed. Such  
293 developmental programs form a physical and dynamic barrier. When microbes attempt to  
294 establish themselves in the skin, they are consistently removed by skin exfoliation  
295 (Dettmer, 2021). Patients with hyperkeratosis show an accumulation of dead cells on the  
296 outer layer of their skin, making it more susceptible to microbial infection (Cheng *et al.*,  
297 1992). Our results suggest that root cap turnover in Arabidopsis, similar to human skin  
298 turnover, may be a sophisticated physical mechanism to prevent or reduce intracellular  
299 microbial colonization near the root meristematic tissue. In contrast, despite the delayed

300 clearance phenotype, *bfn1-1* does not appear to accumulate additional root cap layers  
301 and thus preventing fungal accommodation in the root tip.

302 Together, we demonstrate that proper root cap development, including cell death and cell  
303 clearance, influences plant-microbe interactions and is important for restricting microbial  
304 colonization in the root tip (**Fig. 8**).

### 305 **Microbial manipulation of developmental cell death**

306 The root cap is thought to be associated with protection of the underlying meristematic  
307 stem cells (Kumar & Iyer-Pascuzzi, 2020). Previous studies have highlighted the  
308 importance of the root cap in plant-microbe interactions, for example the physical removal  
309 of the root cap in maize plants leads to increased colonization of the root tip by  
310 *Pseudomonas fluorescens* (Humphris *et al.*, 2005). However, little is known about the  
311 impact of microbial colonization on plant dPCD. Here, we propose that microbes affect  
312 dPCD and corpse clearance in the root cap of Arabidopsis by downregulating the  
313 nuclease *BFN1*.

314 Many features of the root phenotype induced by *S. indica* colonization show striking  
315 similarities to the root phenotype of the *bfn1-1* mutant. These similarities include the cell  
316 death pattern in differentiated root tissue, which might be a remnant of delayed LRC  
317 corpse clearance and promotes fungal growth. Furthermore, we observed a shortened  
318 elongation zone, for which we cannot discriminate whether it is due to an effect on cell  
319 division, cell elongation or a systemic effect on the whole root tip zone leading to an earlier  
320 onset of the root hair zone. Interestingly, we detected a shortening of the elongation zone  
321 in Arabidopsis colonized by *Serendipita vermifera*, which also downregulates *BFN1*.  
322 Concerning the increased protein aggregation in *bfn1-1* and *S. indica*-colonized WT roots,  
323 it is still unknown whether *S. indica*-induced protein misfolding and aggregation is directly  
324 or indirectly linked to *BFN1* downregulation or whether other components contribute to  
325 this phenotype. However, the similarities in *bfn1-1* and *S. indica*-induced phenotypes  
326 suggest that the biphasic colonization strategy of *S. indica* in Arabidopsis may be related  
327 to the temporal downregulation of the nuclease activity of *BFN1* and thus to the  
328 manipulation of dPCD in the root cap.

329 The mechanism underlying *BFN1* downregulation by *S. indica* remains to be investigated.  
330 It is unclear whether an active interference by fungal effector proteins and signaling  
331 molecules or a systemic response of Arabidopsis occurs in the presence of *S. indica*.  
332 Previous studies have shown that *S. indica* preferentially colonizes roots in the mature  
333 differentiation zone, but we also observed a cell death pattern at the onset of the  
334 differentiation tissue near the root tip. Therefore, we suggest that active downregulation  
335 by effector proteins is unlikely due to the spatial separation of the two zones (**Fig. 6**). In  
336 addition, we have shown that other beneficial microbes such as the closely related fungus  
337 *S. vermifera* and two synthetic bacterial communities isolated from Arabidopsis and  
338 *Hordeum vulgare* (Mahdi et al., 2022) also downregulate *BFN1* during Arabidopsis  
339 colonization. These results highlight the possibility of a conserved systemic response of  
340 Arabidopsis to beneficial microbes that involves the downregulation of *BFN1* to facilitate  
341 symbiotic interactions. It remains to be clarified whether this applies only to beneficial or  
342 also to pathogenic microbes. Unlike *SMB*, *BFN1* expression in Arabidopsis is not  
343 restricted to the root cap, but can also be found in cells adjacent to emerging lateral root  
344 primordia, in differentiating xylem tracheary elements, as well as in senescent leaves, and  
345 in the abscission zones of flowers and seeds (Farage-Barhom *et al.*, 2008, Escamez et  
346 al., 2020). Therefore, future studies should clarify whether downregulation of senescence-  
347 associated *BFN1* in Arabidopsis roots by microbes occurs locally in the root cap as part  
348 of *SMB*-induced cell death or also as part of developmental cell death processes in the  
349 differentiation zone.

350 In conclusion, our data indicate that tight regulation of host dPCD and proper root cap  
351 clearance play an important role in restricting fungal colonization. However, microbes may  
352 have evolved strategies to manipulate dPCD and root cap turnover, to promote symbiotic  
353 colonization in dying root cells (**Fig. 8**).

## 354 **Materials and methods**

### 355 **Fungal strains and growth conditions**

356 Fungal experiments were performed with *Serendipita indica* strain DSM11827 (German  
357 Collection of Microorganisms and Cell Cultures, Braunschweig, Germany). *S. indica* was  
358 grown on complete medium (CM) containing 2% (w/v) glucose and 1.5% (w/v) agar

359 (Hilbert et al., 2012). Fungal material was grown at 28°C in the dark for 4 weeks before  
360 spore preparation.

361 For additional experiments, fungal strain *Serendipita vermifera* (MAFF305830) was used  
362 and grown on MYP medium containing 1.5% agar at 28°C in darkness for 3 weeks before  
363 mycelium preparation for root inoculation.

#### 364 **Plant material and growth conditions**

365 Seeds of *Arabidopsis thaliana* ecotype Columbia 0 (Col-0) and T-DNA insertion mutants  
366 (*bfn1-1* [GK-197G12] and *smb3* [SALK\_143526C]) in Col-0 background were used for  
367 experiments.

368 Seeds were surface sterilized in 70% ethanol for 15 min and 100% ethanol for 12 min,  
369 stratified at 4°C in the dark for 3 days and germinated and grown on ½ MS medium  
370 (Murashige-Skoog Medium, with vitamins, pH 5.7) containing 1% (w/v) sucrose and 0.4%  
371 (w/v) Gelrite under short-day conditions (8 h light, 16 h dark) with 130  $\mu\text{mol m}^{-2} \text{s}^{-1}$  light  
372 and 22°C/18 °C.

#### 373 **Fungal inoculation**

374 One-week-old seedlings were transferred to 1/10 PNM (Plant Nutrition Medium, pH 5.7)  
375 plates without sucrose, using 15 to 20 seedlings per plate. Under sterile conditions,  
376 chlamydospores of *S. indica* were scraped from solid CM plates in 0.002% Tween water  
377 (Roth), washed two times with ddH<sub>2</sub>O and pipetted in a volume of 2 ml directly on plant  
378 roots and surrounding area in a concentration of 5x10<sup>5</sup> per plate. ddH<sub>2</sub>O was used for  
379 inoculation of mock plants. Unless otherwise indicated, plants were treated using this  
380 inoculation protocol. Where indicated, we also inoculated *Arabidopsis* seeds with *S.*  
381 *indica*. For this case, *Arabidopsis* seeds were surface sterilized, incubated with fungal  
382 spore solution at 5x10<sup>5</sup> concentration for 1 hour and plated on ½ MS plates (without  
383 sucrose).

384 For *S. vermifera* inoculation, mycelium was scrapped from plates in ddH<sub>2</sub>O, washed and  
385 added to *Arabidopsis* roots in a volume of 1 ml of a stock solution of 1 g / 50 ml.

#### 386 **Evans blue staining**

387 For the visualization of cell death in Arabidopsis roots a modified protocol by  
388 (Vijayaraghavareddy *et al.*, 2017) was used. Roots were washed three times in ddH<sub>2</sub>O to  
389 remove loose external fungal growth and then stained for 15 min in 2 mM Evans blue  
390 (Sigma-Aldrich) dissolved in 0.1 M CaCl<sub>2</sub> pH 5.6. Following, roots were washed  
391 extensively with ddH<sub>2</sub>O for 1 hour and a Leica M165 FC microscope was used for  
392 imaging.

393 To quantify Evans blue staining intensity, ImageJ was used to invert the pictures, draw  
394 out individual roots and measure and compare mean grey values.

### 395 **Extraradical colonization assays**

396 To quantify extraradical colonization of *S. indica* on Arabidopsis, seed-inoculated plants  
397 were grown for 10 days. Inoculated and mock-treated seedlings were stained directly on  
398 plate by pipetting 2 ml of 1X PBS solution containing Alexa Fluor 488 conjugated with  
399 Wheat Germ Agglutinin (WGA-AF 488, Invitrogen). After 2 min of incubation, the roots  
400 were washed twice on the plate with 1X PBS solution. The stained seedlings were  
401 transferred to a fresh ½ MS plate and scanned with an Odyssey M Imaging System (LI-  
402 COR Biosciences) using brightfield and Alexa Fluor 488 channel. Quantification of WGA-  
403 AF 488 fluorescence was performed using EmpiriaStudio Software (LI-COR  
404 Biosciences).

### 405 **RNA extraction (intraradical colonization assay)**

406 For RNA extraction to measure intraradical colonization, plants were harvested at three  
407 time points around 7, 10 and 14 dpi. The roots were extensively wash with ddH<sub>2</sub>O and  
408 tissue paper was used carefully wipe off external fungal colonization. The roots were  
409 shock frozen in liquid nitrogen and fungal and plant RNA was extracted with TRIzol  
410 (Invitrogen, Thermo Fisher Scientific, Schwerte, Germany). After a DNase I (Thermo  
411 Fisher Scientific) treatment according to the manufacturer's instructions to remove DNA,  
412 RNA was synthesized to cDNA using the Fermentas First Strand cDNA Synthesis Kit  
413 (Thermo Fisher Scientific).

### 414 **Quantitative RT-PCR analysis**

415 The quantitative real time-PCR (qRT-PCR) was performed using a CFX connect real time  
416 system (BioRad) with the following program: 95 °C 3min, 95 °C 15s, 59 °C 20s, 72 °C 30  
417 s, 40 cycles and melting curve analysis. Relative expression was calculated using the 2<sup>-</sup>  
418  $\Delta\Delta\text{CT}$  method (Livak and Schmittgen 2001). qRT-PCR primers can be found in Table S1.

#### 419 **Filter trap analyses**

420 Filter trap assays were performed as previously described (Llamas *et al.*, 2022, Llamas  
421 *et al.*, 2021). Protein extracts were obtained using native lysis buffer (300 mM NaCl,  
422 100 mM HEPES pH 7.4, 2 mM EDTA, 2% Triton X-100) supplemented with 1x plant  
423 protease inhibitor (Merck). Cell debris was removed by several centrifugation steps at  
424 8,000 x *g* for 10 min at 4 °C. The supernatant was separated, and protein concentration  
425 determined using the Pierce BCA Protein Assay Kit (Thermo Fisher). A cellulose acetate  
426 membrane filter (GE Healthcare Life Sciences) and 3 filter papers (BioRad, 1620161)  
427 were immersed in 1x PBS and placed in a slot blot apparatus (Bio-Rad) connected to a  
428 vacuum system. The membrane was equilibrated by 3 washes with equilibration buffer  
429 (native buffer containing 0.5% SDS). 300, 200 and 100 µg of the protein extract were  
430 mixed with SDS at a final concentration of 0.5% and filtered through the membrane. The  
431 membrane was then washed with 0.2% SDS and blocked with 3% BSA in TBST for 30  
432 minutes, followed by 3 washes with TBST. Incubation was performed with anti-polyQ  
433 [1:1000] (Merck, MAB1574). The membrane was washed 3 times for 5 min and incubated  
434 with secondary antibodies in TBST 3% BSA for 30 min. The membrane was developed  
435 using the Odyssey M Imaging System (LI-COR Biosciences). Extracts were also analyzed  
436 by SDS-PAGE and western blotting against anti-Actin [1:5000] (Agrisera, AS132640) to  
437 determine loading controls.

#### 438 **Confocal laser scanning microscopy (CLSM) and Proteostat staining quantification**

439 CLSM images were acquired using either the FV1000 confocal laser scanning  
440 microscope (Olympus) or a Meta 710 confocal microscope with laser ablation 266 nm  
441 (Zeiss). All images were acquired using the same parameters between experiments.  
442 Excitation of WGA-AF 488 was done with an argon laser at 488 nm and the emitted  
443 light was detected with a hybrid detector at 500-550 nm. Proteostat was excited at  
444 561 nm and the signal was detected between 590-700 nm. Hoechst was excited

445 with a diode laser at 405 nm and the emitted light was detected with a hybrid  
446 detector at 415-460 nm.

#### 447 **Proteostat staining**

448 For the detection of aggregated proteins, we used the Proteostat Aggresome detection  
449 kit (Enzo Life Sciences). Seedlings were stained according to the manufacturer's  
450 instructions. Seedlings were incubated with permeabilizing solution (0.5% Triton X-100,  
451 3 mM EDTA, pH 8.0) for 30 minutes at 4°C with gentle shaking. The seedlings were  
452 washed twice with 1X PBS. Then the plants were incubated in the dark with 1x PBS  
453 supplemented with 0.5 µl/ml Proteostat and 0.5 µl/ml Hoechst 33342 (nuclear stain) for  
454 30 min at room temperature. Finally, the seedlings were washed twice with 1x PBS and  
455 mounted on a slide for CLSM analysis or in mounted in fresh MS plates for LI-COR  
456 analysis. Quantification of Proteostat fluorescence was performed using Fiji software or  
457 EmpiriaStudio Software (LI-COR Biosciences).

#### 458 **Transcriptomic analysis**

459 Arabidopsis Col-0 roots were inoculated with *S. indica*. Arabidopsis roots were harvested  
460 from mock plants and inoculated plants at three different time points after inoculation: 3,  
461 6 and 10 dpi. Three biological replicates were considered for each condition. The RNA-  
462 seq libraries were generated and sequenced at US Department of Energy Joint Genome  
463 Institute (JGI) under a project proposal (Proposal ID: 505829) (Zuccaro & Langen, 2020).  
464 For each sample, stranded RNASeq libraries were generated and quantified by qRT-  
465 PCR. RNASeq libraries were sequenced with Illumina sequencer. Raw reads were filtered  
466 and trimmed using the JGI QC pipeline. Filtered reads from each library were aligned to  
467 the Arabidopsis genome (TAIR10) using HISAT2 (Kim *et al.*, 2015) and the reads mapped  
468 to each gene were counted using featureCounts (Liao *et al.*, 2014) Differential gene  
469 expression analysis was performed using the R package DESeq2 (Love *et al.*, 2014).  
470 Genes having aFDR adjusted p-value < 0.05 were considered as differentially expressed  
471 genes (DEGs).

#### 472 **CONTRIBUTIONS**



473 Conceptualization: NC, EL, MN, AZ  
474 Methodology: NC, EL, CDQ  
475 Investigation: NC, EL, CDQ, DV, MN, AZ  
476 Visualization: NC, EL, CDQ  
477 Funding acquisition: MN, AZ  
478 Project administration: AZ  
479 Supervision: MN, AZ  
480 Writing original draft: EL, NC, AZ  
481 Writing review and editing: All authors

482

### 483 **Acknowledgements**

484 We thank the imaging facilities of CECAD (A. Schauss and C. Jüngst) and CEPLAS (P.S.  
485 Tan) for their assistance with CLSM. We thank Lisa Mahdi for conducting the experiments  
486 and providing the samples used for the RNA-seq analysis. We further would like to thank  
487 Yu Zhang, Sravanthi Tejomurthula, Daniel Peterson, Vivian Ng & Igor Grigoriev and their  
488 work performed in the work proposal (10.46936/10.25585/60001292) conducted by the  
489 U.S. Department of Energy Joint Genome Institute (<https://ror.org/04xm1d337>), a DOE  
490 Office of Science User Facility, is supported by the Office of Science of the U.S.  
491 Department of Energy operated under Contract No. DE-AC02-05CH11231.

492

### 493 **Funding**

494 German Research Foundation (DFG) - Excellence Strategy of the Federal Republic of  
495 Germany - EXC-2048/1 - project ID 390686111 (CEPLAS) (NC, EL, AZ)

496 German Research Foundation (DFG) - SFB-1403-414786233 (AZ)

497 German Research Foundation (DFG) - German Excellence Strategy-CECAD, EXC 2030-  
498 390661388 (DV).

499 **Competing interests:**

500 The Authors declare that they have no competing interests.

501 **Data and materials availability:**

502 All data are available in the main text or supplementary materials. Additional  
503 data/materials for this paper can be requested from the authors.

504

505 **References**

506 Barlow, P. W. (2002) The Root Cap: Cell Dynamics, Cell Differentiation and Cap  
507 Function. *Journal of Plant Growth Regulation*, **21**, 261-286.

508 Bennett, T., van den Toorn, A., Sanchez-Perez, G. F., Campilho, A., Willemsen, V.,  
509 Snel, B., *et al.* (2010) SOMBRERO, BEARSKIN1, and BEARSKIN2 regulate root  
510 cap maturation in Arabidopsis. *Plant Cell*, **22**, 640-654.

511 Boorboori, M. R. and Zhang, H. Y. (2022) The Role of *Serendipita indica*  
512 (*Piriformospora indica*) in Improving Plant Resistance to Drought and Salinity  
513 Stresses. *Biology (Basel)*, **11**.

514 Cheng, J., Syder, A. J., Yu, Q. C., Letai, A., Paller, A. S. and Fuchs, E. (1992) The  
515 genetic basis of epidermolytic hyperkeratosis: a disorder of differentiation-specific  
516 epidermal keratin genes. *Cell*, **70**, 811-819.

517 Deshmukh, S., Huckelhoven, R., Schafer, P., Imani, J., Sharma, M., Weiss, M., *et al.*  
518 (2006) The root endophytic fungus *Piriformospora indica* requires host cell death  
519 for proliferation during mutualistic symbiosis with barley. *Proc Natl Acad Sci U S*  
520 *A*, **103**, 18450-18457.

521 Dettmer, P. (2021) *Immune: The new book from Kurzgesagt - a gorgeously illustrated*  
522 *deep dive into the immune system*. Hodder & Stoughton.

- 523 Dolan, L., Janmaat, K., Willemsen, V., Linstead, P., Poethig, S., Roberts, K., *et al.*  
524 (1993) Cellular organisation of the Arabidopsis thaliana root. *Development*, **119**,  
525 71-84.
- 526 Dunken, N., Widmer, H., Balcke, G. U., Straube, H., Langen, G., Charura, N. M., *et al.*  
527 (2022) A fungal endophyte-generated nucleoside signal regulates host cell death  
528 and promotes root colonization. *bioRxiv*, 2022.2003.2011.483938.
- 529 Duxbury, Z., Wang, S., MacKenzie, C. I., Tenthorey, J. L., Zhang, X., Huh, S. U., *et al.*  
530 (2020) Induced proximity of a TIR signaling domain on a plant-mammalian NLR  
531 chimera activates defense in plants. *Proc Natl Acad Sci U S A*, **117**, 18832-  
532 18839.
- 533 Escamez, S., Andre, D., Sztojka, B., Bollhoner, B., Hall, H., Berthet, B., *et al.* (2020)  
534 Cell Death in Cells Overlying Lateral Root Primordia Facilitates Organ Growth in  
535 Arabidopsis. *Curr Biol*, **30**, 455-464 e457.
- 536 Farage-Barhom, S., Burd, S., Sonogo, L., Perl-Treves, R. and Lers, A. (2008)  
537 Expression analysis of the BFN1 nuclease gene promoter during senescence,  
538 abscission, and programmed cell death-related processes. *J Exp Bot*, **59**, 3247-  
539 3258.
- 540 Fendrych, M., Van Hautegeem, T., Van Durme, M., Olvera-Carrillo, Y., Huysmans, M.,  
541 Karimi, M., *et al.* (2014) Programmed cell death controlled by  
542 ANAC033/SOMBRERO determines root cap organ size in Arabidopsis. *Curr Biol*,  
543 **24**, 931-940.
- 544 Feng, Q., De Rycke, R., Dagdas, Y. and Nowack, M. K. (2022) Autophagy promotes  
545 programmed cell death and corpse clearance in specific cell types of the  
546 Arabidopsis root cap. *Curr Biol*, **32**, 2110-2119 e2113.
- 547 Fesel, P. H. and Zuccaro, A. (2016) Dissecting endophytic lifestyle along the  
548 parasitism/mutualism continuum in Arabidopsis. *Curr Opin Microbiol*, **32**, 103-  
549 112.
- 550 Heo, J. O., Blob, B. and Helariutta, Y. (2017) Differentiation of conductive cells: a matter  
551 of life and death. *Curr Opin Plant Biol*, **35**, 23-29.

- 552 Humphris, S. N., Bengough, A. G., Griffiths, B. S., Kilham, K., Rodger, S., Stubbs, V., *et*  
553 *al.* (2005) Root cap influences root colonisation by *Pseudomonas fluorescens*  
554 SBW25 on maize. *FEMS Microbiol Ecol*, **54**, 123-130.
- 555 Huysmans, M., Buono, R. A., Skorzinski, N., Radio, M. C., De Winter, F., Parizot, B., *et*  
556 *al.* (2018) NAC Transcription Factors ANAC087 and ANAC046 Control Distinct  
557 Aspects of Programmed Cell Death in the Arabidopsis Columella and Lateral  
558 Root Cap. *Plant Cell*, **30**, 2197-2213.
- 559 Jacobs, S., Zechmann, B., Molitor, A., Trujillo, M., Petutschnig, E., Lipka, V., *et al.*  
560 (2011) Broad-spectrum suppression of innate immunity is required for  
561 colonization of Arabidopsis roots by the fungus *Piriformospora indica*. *Plant*  
562 *Physiol*, **156**, 726-740.
- 563 Kim, D., Langmead, B. and Salzberg, S. L. (2015) HISAT: a fast spliced aligner with low  
564 memory requirements. *Nat Methods*, **12**, 357-360.
- 565 Kumar, N. and Iyer-Pascuzzi, A. S. (2020) Shedding the Last Layer: Mechanisms of  
566 Root Cap Cell Release. *Plants (Basel)*, **9**.
- 567 Kumpf, R. P. and Nowack, M. K. (2015) The root cap: a short story of life and death. *J*  
568 *Exp Bot*, **66**, 5651-5662.
- 569 Liao, Y., Smyth, G. K. and Shi, W. (2014) featureCounts: an efficient general purpose  
570 program for assigning sequence reads to genomic features. *Bioinformatics*, **30**,  
571 923-930.
- 572 Llamas, E., Koyuncu, S., Lee, H. J., Gutierrez-Garcia, R., Dunken, N., Charura, N., *et*  
573 *al.* (2022) Chloroplast protein import determines plant proteostasis and  
574 retrograde signaling. *bioRxiv*, 2022.2003.2019.484971.
- 575 Llamas, E., Torres-Montilla, S., Lee, H. J., Barja, M. V., Schlimgen, E., Dunken, N., *et*  
576 *al.* (2021) The intrinsic chaperone network of Arabidopsis stem cells confers  
577 protection against proteotoxic stress. *Aging Cell*, **20**, e13446.
- 578 Love, M. I., Huber, W. and Anders, S. (2014) Moderated estimation of fold change and  
579 dispersion for RNA-seq data with DESeq2. *Genome Biol*, **15**, 550.
- 580 Mahdi, L. K., Miyauchi, S., Uhlmann, C., Garrido-Oter, R., Langen, G., Wawra, S., *et al.*  
581 (2022) The fungal root endophyte *Serendipita vermifera* displays inter-kingdom

- 582 synergistic beneficial effects with the microbiota in *Arabidopsis thaliana* and  
583 barley. *ISME J*, **16**, 876-889.
- 584 Moriwaki, T., Miyazawa, Y., Kobayashi, A. and Takahashi, H. (2013) Molecular  
585 mechanisms of hydrotropism in seedling roots of *Arabidopsis thaliana*  
586 (Brassicaceae). *Am J Bot*, **100**, 25-34.
- 587 Olvera-Carrillo, Y., Van Bel, M., Van Hautegeem, T., Fendrych, M., Huysmans, M.,  
588 Simaskova, M., *et al.* (2015) A Conserved Core of Programmed Cell Death  
589 Indicator Genes Discriminates Developmentally and Environmentally Induced  
590 Programmed Cell Death in Plants. *Plant Physiol*, **169**, 2684-2699.
- 591 Reza, S. H., Delhomme, N., Street, N. R., Ramachandran, P., Dalman, K., Nilsson, O.,  
592 *et al.* (2018) Transcriptome analysis of embryonic domains in Norway spruce  
593 reveals potential regulators of suspensor cell death. *PLoS One*, **13**, e0192945.
- 594 Shi, C. L., von Wangenheim, D., Herrmann, U., Wildhagen, M., Kulik, I., Kopf, A., *et al.*  
595 (2018) The dynamics of root cap sloughing in *Arabidopsis* is regulated by peptide  
596 signalling. *Nat Plants*, **4**, 596-604.
- 597 Vijayaraghavareddy, P., Adhinarayanreddy, V., Vemanna, R. S., Sreeman, S. and  
598 Makarla, U. (2017) Quantification of Membrane Damage/Cell Death Using Evan's  
599 Blue Staining Technique. *Bio Protoc*, **7**, e2519.
- 600 Weiss, M., Waller, F., Zuccaro, A. and Selosse, M. A. (2016) Sebaciales - one  
601 thousand and one interactions with land plants. *New Phytol*, **211**, 20-40.
- 602 Willemsen, V., Bauch, M., Bennett, T., Campilho, A., Wolkenfelt, H., Xu, J., *et al.* (2008)  
603 The NAC domain transcription factors FEZ and SOMBRERO control the  
604 orientation of cell division plane in *Arabidopsis* root stem cells. *Dev Cell*, **15**, 913-  
605 922.
- 606 Yu, D., Song, W., Tan, E. Y. J., Liu, L., Cao, Y., Jirschitzka, J., *et al.* (2022) TIR  
607 domains of plant immune receptors are 2',3'-cAMP/cGMP synthetases mediating  
608 cell death. *Cell*, **185**, 2370-2386 e2318.
- 609 Zuccaro, A., Lahrmann, U., Guldener, U., Langen, G., Pfiffi, S., Biedenkopf, D., *et al.*  
610 (2011) Endophytic life strategies decoded by genome and transcriptome  
611 analyses of the mutualistic root symbiont *Piriformospora indica*. *PLoS Pathog*, **7**,  
612 e1002290.

613 Zuccaro, A. and Langen, G. (2020) Host-specific regulation of effector gene expression  
614 in mutualistic root endophytic fungi (Proposal ID: 505829). JGI Award

615

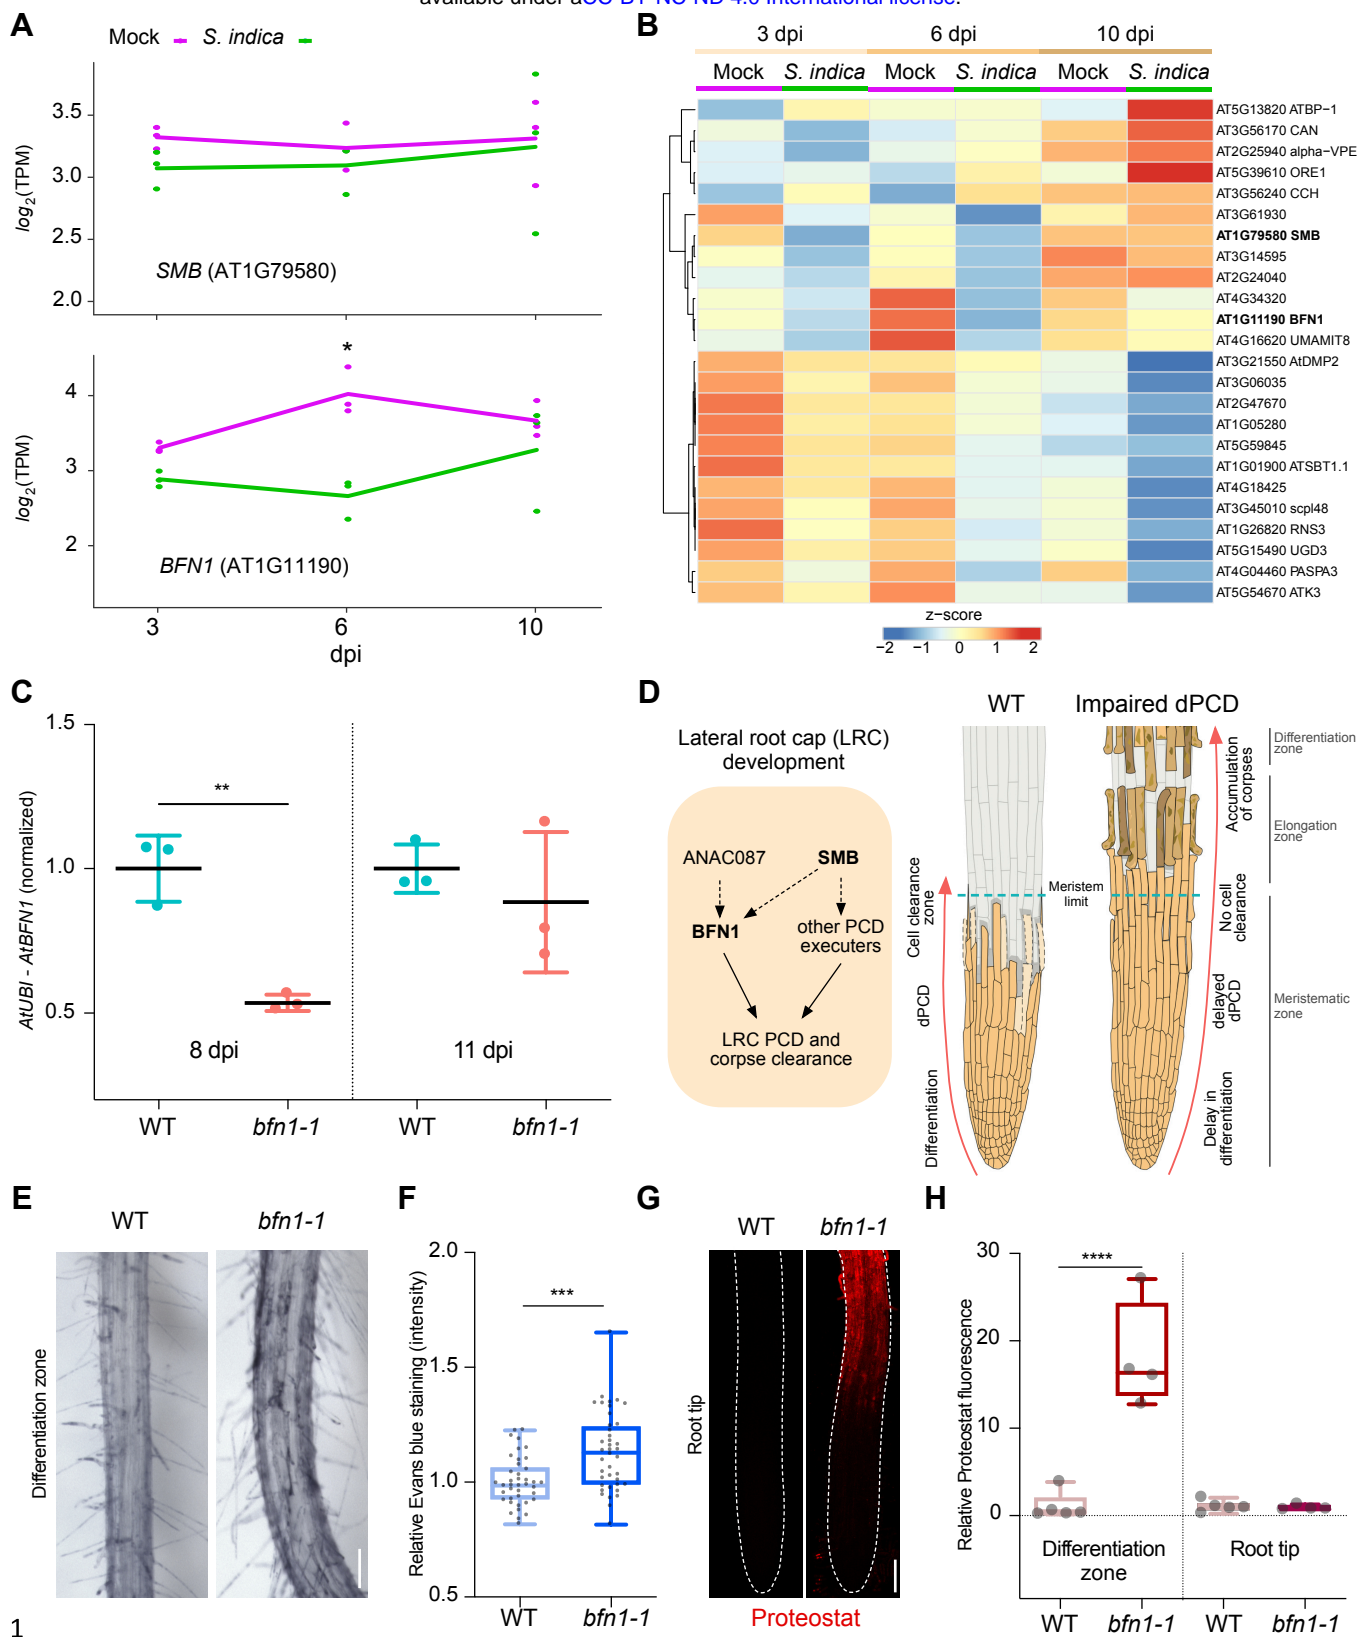

2 **Figure 1. *BFN1* is downregulated during interaction with *S. indica*.** (A) Expression  
3 profiles of *SMB* and *BFN1* genes in Arabidopsis roots mock-treated or inoculated with *S.*  
4 *indica* at 3, 6 and 10 dpi. The log<sub>2</sub>-transformed TPM values are shown and the lines  
5 indicate the average expression values among the 3 biological replicates. Asterisk  
6 indicates significantly different expression (adjusted p-value < 0.05) (B) The heat map  
7 shows the expression values (TPM) of Arabidopsis dPCD marker genes with at least an  
8 average of 1 TPM across Arabidopsis roots mock-treated or inoculated with *S. indica* at  
9 3, 6 and 10 dpi. The TPM expression values are log<sub>2</sub> transformed and row-scaled. Genes  
10 are clustered using spearman correlation as distance measure. The dPCD gene markers  
11 were previously defined (Olvera-Carrillo *et al.*, 2015). (C) *BFN1* expression in WT  
12 Arabidopsis during *S. indica* colonization at 8 and 11 dpi. RNA was isolated from 3  
13 biological replicates for qRT-PCR analysis, comparing *BFN1* expression with an  
14 Arabidopsis ubiquitin marker gene. (D) Schematic representation of lateral root cap (LRC)  
15 development in WT and in mutant plants impaired in dPCD. (E) Representative images  
16 of the differentiation zone of 14-day-old WT and *bfn1-1* roots, stained with Evans blue.  
17 Scale indicates 100 μm. (F) Quantification of Evans blue staining, comparing 14-day-old  
18 WT and *bfn1-1* roots. 10 plants were used for each genotype, taking 4 pictures along the  
19 main root axis per plant. ImageJ was used to calculate the mean grey value to compare  
20 relative staining intensity. Statistical significance was determined using an unpaired, two-  
21 tailed Student's t test before normalization (\*\*\*)  $P < 0.0001$ . (G) Representative Proteostat  
22 staining images of 10-day-old WT and *bfn1-1* root tips. Scale indicates 100 μm. (H)  
23 Quantification of Proteostat staining using 4 to 5 10-day-old WT and *bfn1-1* roots.  
24 Statistical analysis was performed via one-way ANOVA and Tukey's post hoc test before  
25 normalization (significance threshold:  $P \leq 0.05$ ).



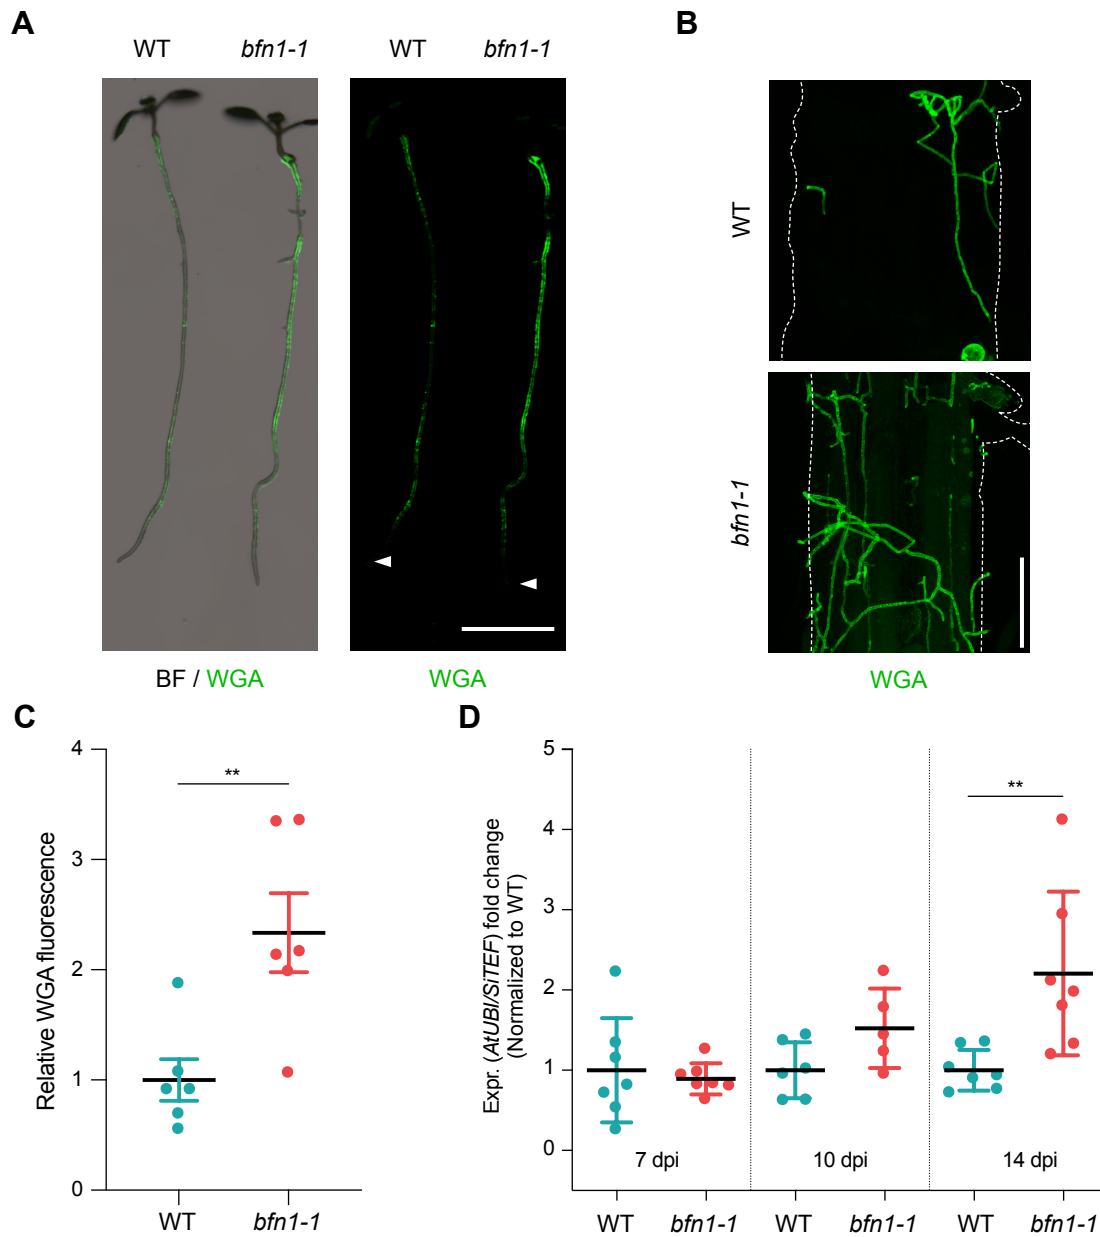

26

27 **Figure 2. *bfn1-1* roots show increased colonization by *S. indica*.** (A) Representative  
28 images show extraradical colonization of 10-day-old WT and *bfn1-1* plants, seed-  
29 inoculated with *S. indica*. The fungus was stained with WGA-AF 488. Roots were scanned  
30 and captured with a LI-COR Odyssey M imager using the bright field (BF) and Alexa Fluor  
31 488 channel. Arrowheads indicate the position of the root tips. Scale indicates 5 mm. (B)  
32 Representative images of Arabidopsis WT and *bfn1-1* roots inoculated with *S. indica*  
33 obtained by CLSM. The fungus was stained with WGA-AF 488. Scale represents 50 μm.  
34 (C) Relative quantification of WGA-AF 488 signal as a proxy for extra-radical colonization  
35 of *bfn1-1* and WT roots. Statistical comparisons were made by unpaired, two-tailed  
36 Student's t test for unpaired samples (\*\* $P < 0.01$ ) (D) Quantitative RT-PCR analysis to  
37 measure intraradical *S. indica* colonization in WT and *bfn1-1* roots. Roots were collected  
38 from 3 biological replicates, using approximately 30 plants per time point and replicate for  
39 each genotype. Each time point in the graph is normalized to WT for relative quantification  
40 of colonization. Statistical analysis was performed via one-way ANOVA and Tukey's post  
41 hoc test (significance threshold:  $P \leq 0.05$ ).

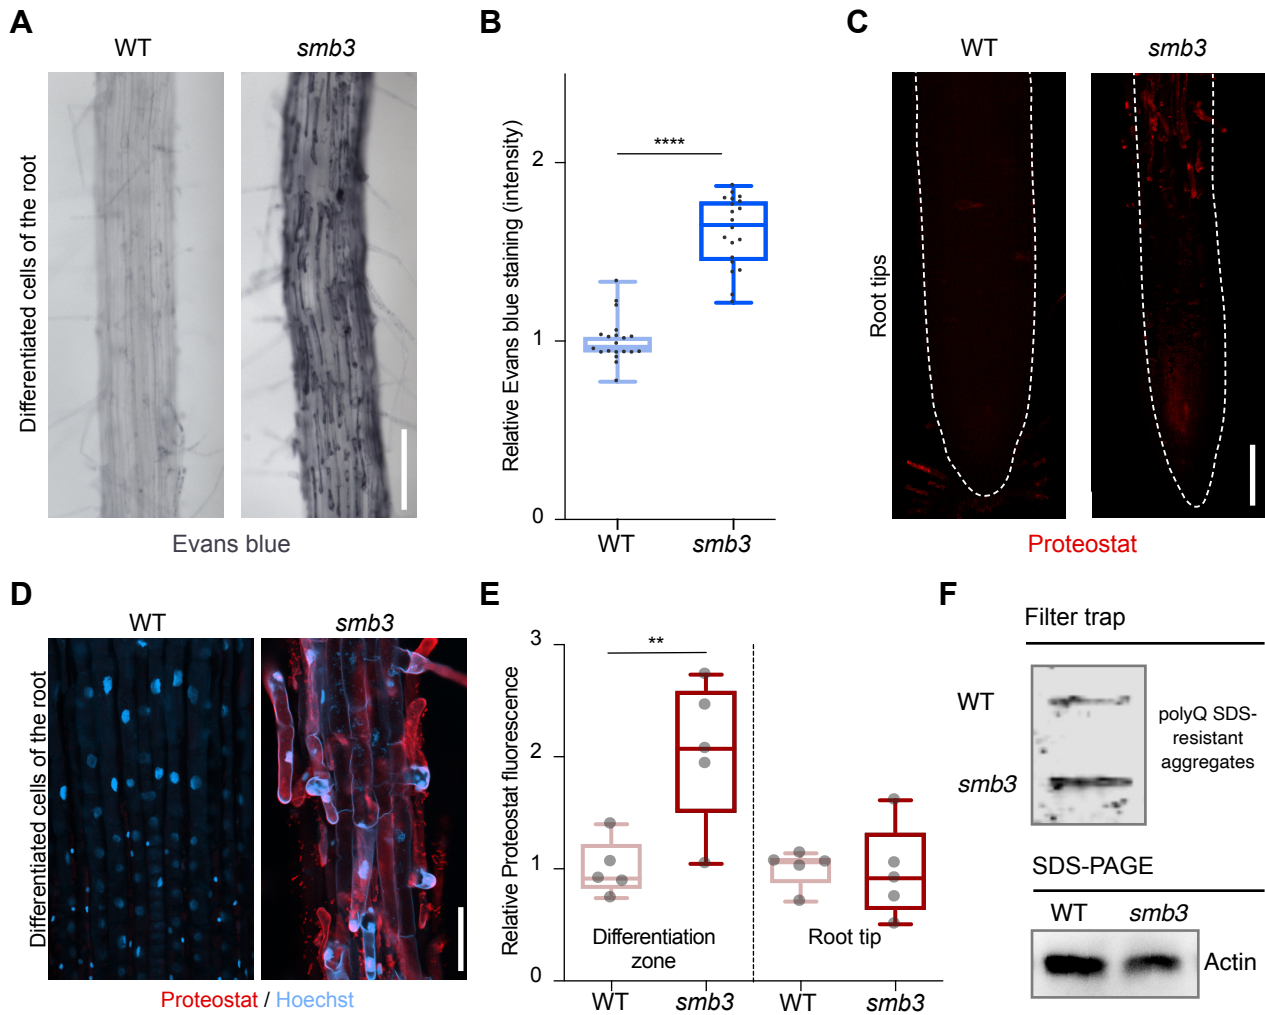

42

43 **Figure 3. *smb3* roots exhibit uncleared cell corpses loaded with misfolded /**  
 44 **aggregated proteins.** (A) Evans blue staining of the differentiation zone in 17-day-old  
 45 WT and *smb3* roots. Scale indicates 100  $\mu$ m. (B) Relative quantification of Evans blue  
 46 staining of the differentiation zone in 14-day-old WT and *smb3* roots. 5 plants per  
 47 genotype were used, taking 4 images per plant along the main root axis. Statistical  
 48 relevance was determined by unpaired, two-tailed Student's t test before normalization  
 49 (\*\*\*\* $P < 0.0001$ ). (C) Representative images of 10-day-old WT and *smb3* roots stained  
 50 with Proteostat (red). Scale indicates 100  $\mu$ m. (D) Magnification of the differentiation zone  
 51 of WT and *smb3* roots. Proteostat (red) and Hoechst (blue) channels are shown. Scale  
 52 indicates 50  $\mu$ m. (E) Quantification of relative Proteostat fluorescence levels comparing  
 53 the differentiation and meristematic zones of WT and *smb3*. 5 x 10-day-old plants were  
 54 used for each genotype. Statistical significance was determined by one-way ANOVA and  
 55 Tukey's post hoc test before normalization (significance threshold:  $P \leq 0.05$ ). (F) Filter  
 56 trap and SDS-PAGE analysis with antibody against poly-glutamine (polyQ) regions of 15-  
 57 day-old WT and *smb3* roots. The images are representative of two independent  
 58 experiments.

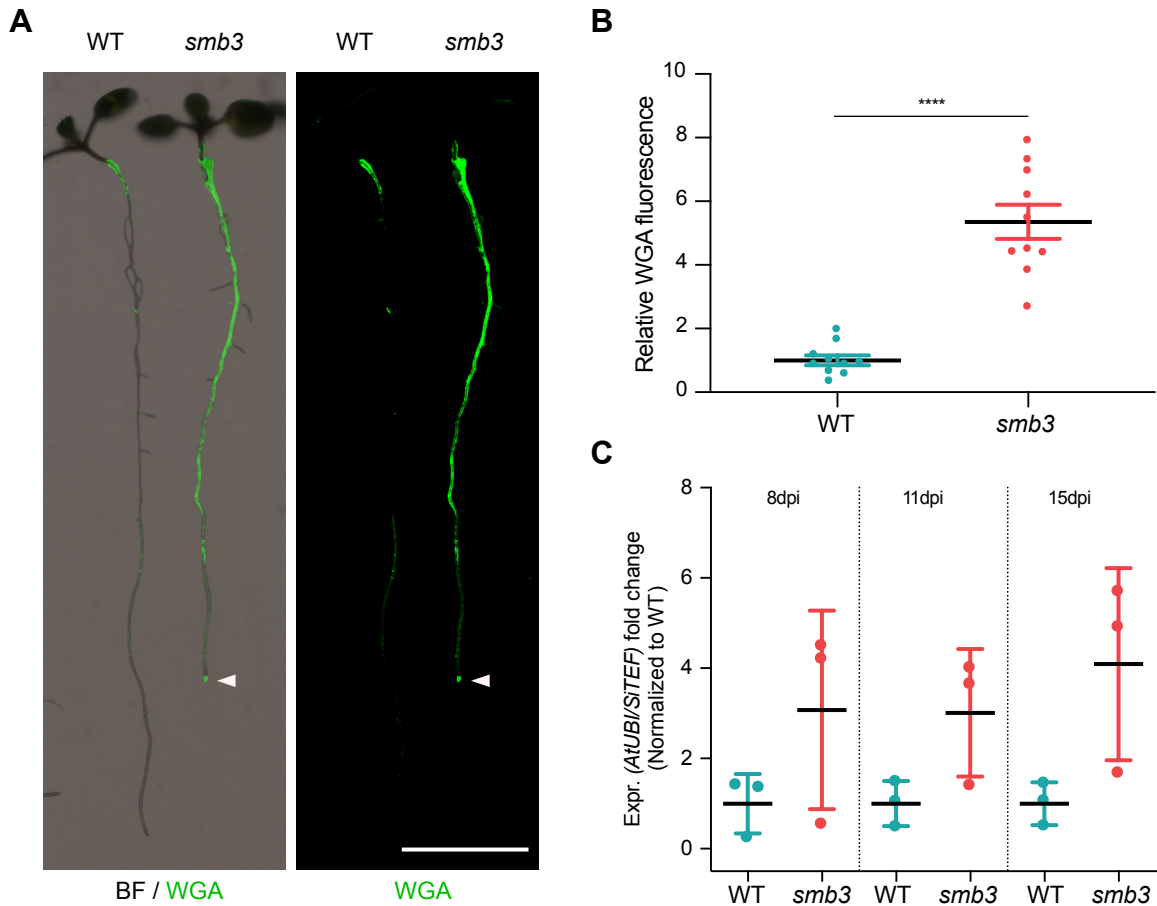

59

60 **Figure 4. *smb3* roots display increased intra- and extraradical colonization by *S.***  
61 ***indica*.** (A) Representative image showing extraradical colonization of 10-day-old WT and  
62 *smb3* seedlings (seed inoculated). *S. indica* was stained with WGA-AF 488. Roots were  
63 scanned and captured with a LI-COR Odyssey M imager using the bright field (BF) and  
64 Alexa Fluor 488 channel. White arrowheads indicate colonization at the root tip in *smb3*.  
65 Scale indicates 5 mm. (B) Relative quantification of WGA-AF 488 signal indicating extra-  
66 radical colonization on *smb3* and WT roots. The statistical comparison was made by two-  
67 tailed Student's t test for unpaired samples (\*\*\*\* $P < 0.0001$ ) using 10 plants. (C)  
68 Measurement of intraradical colonization in WT and *smb3* roots performed by quantitative  
69 RT-PCR. Roots from 3 biological replicates were collected and washed to remove extra-  
70 radical hyphae, using approximately 30 seedlings for each genotype per time point and  
71 replicate. Each time point in the graph is normalized to WT for a relative quantification of  
72 colonization. Statistical analysis was done via one-way ANOVA and Tukey's post hoc test  
73 after normalization (significance threshold:  $P \leq 0.05$ ).

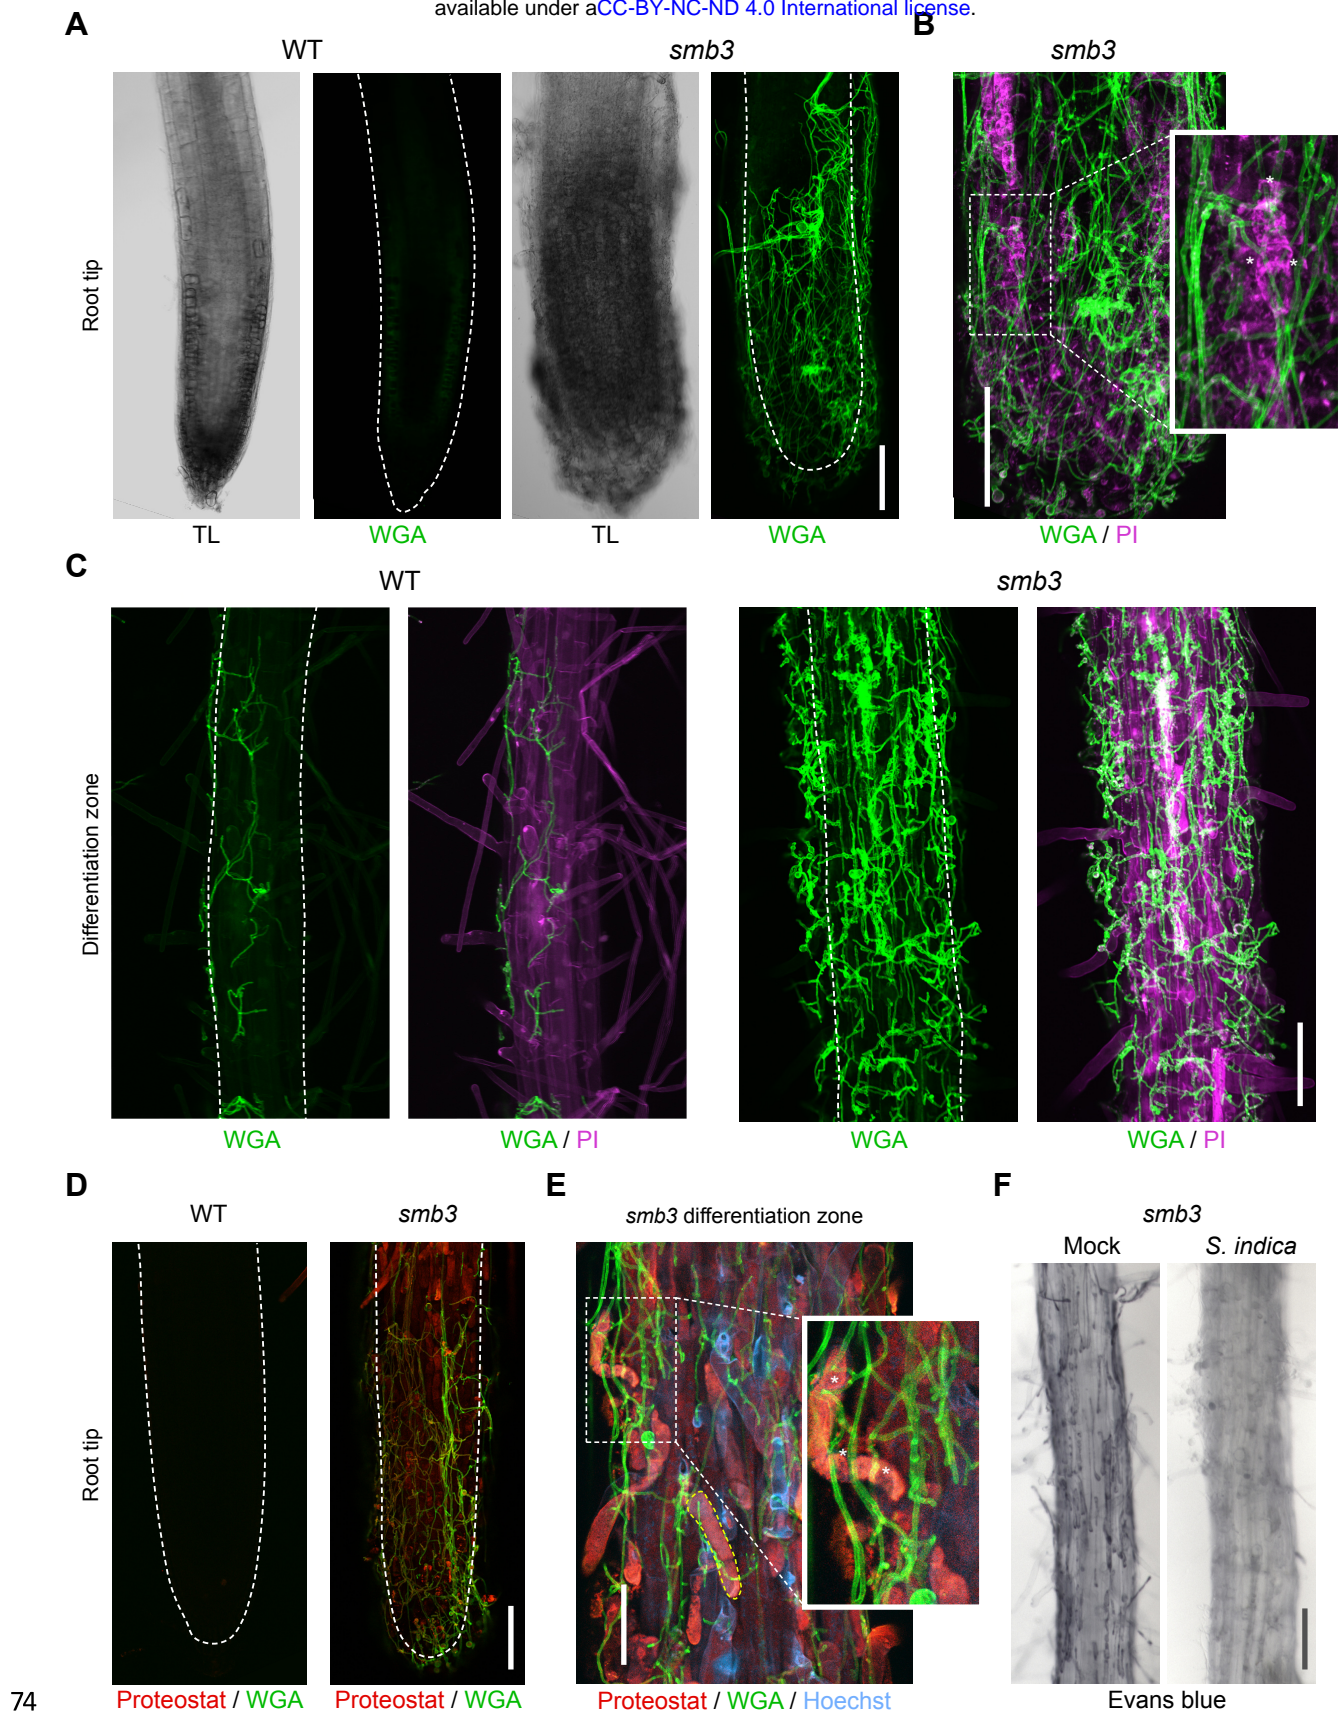

74

75 **Figure 5. Cytological analysis of *S. indica*-colonized *smb3* and WT roots.** For  
76 microscopic analysis, 7-day-old seedlings were inoculated with *S. indica* spores and the  
77 roots were analyzed at 10 dpi. (A) Representative images of Arabidopsis WT and *smb3*  
78 roots inoculated with *S. indica*. *S. indica* was stained with WGA-AF 488. Transmitted light  
79 (TL) images are also shown. Scale indicates 100  $\mu\text{m}$  (B) Magnification of *smb3* root tip  
80 colonized with *S. indica*. Asterisks indicate penetration of hyphae stained with WGA-AF  
81 488 into dead cells stained with propidium iodide (PI). Scale indicates 100  $\mu\text{m}$ . (C)  
82 Representative images of WT and *smb3* roots colonized with *S. indica* and stained with  
83 WGA-AF 488 and PI. Scale indicates 100  $\mu\text{m}$ . (D) Representative images of WT and  
84 *smb3* root tips inoculated with *S. indica* stained with WGA-AF 488 and Proteostat. Scale  
85 indicates 100  $\mu\text{m}$  (E) Magnification of *smb3* root differentiation zone showing *S. indica*  
86 colonization stained with WGA-AF 488, Hoechst and Proteostat. Penetration of uncleared  
87 cell corpses is marked with asterisks. Dotted yellow line indicates LRC cell corpse. Scale  
88 indicates 50  $\mu\text{m}$ . (F) Evans blue staining showing sections of the differentiation zone in  
89 *smb3* mock-treated and colonized roots with *S. indica* at 10 dpi. Scale indicates 100  $\mu\text{m}$ .

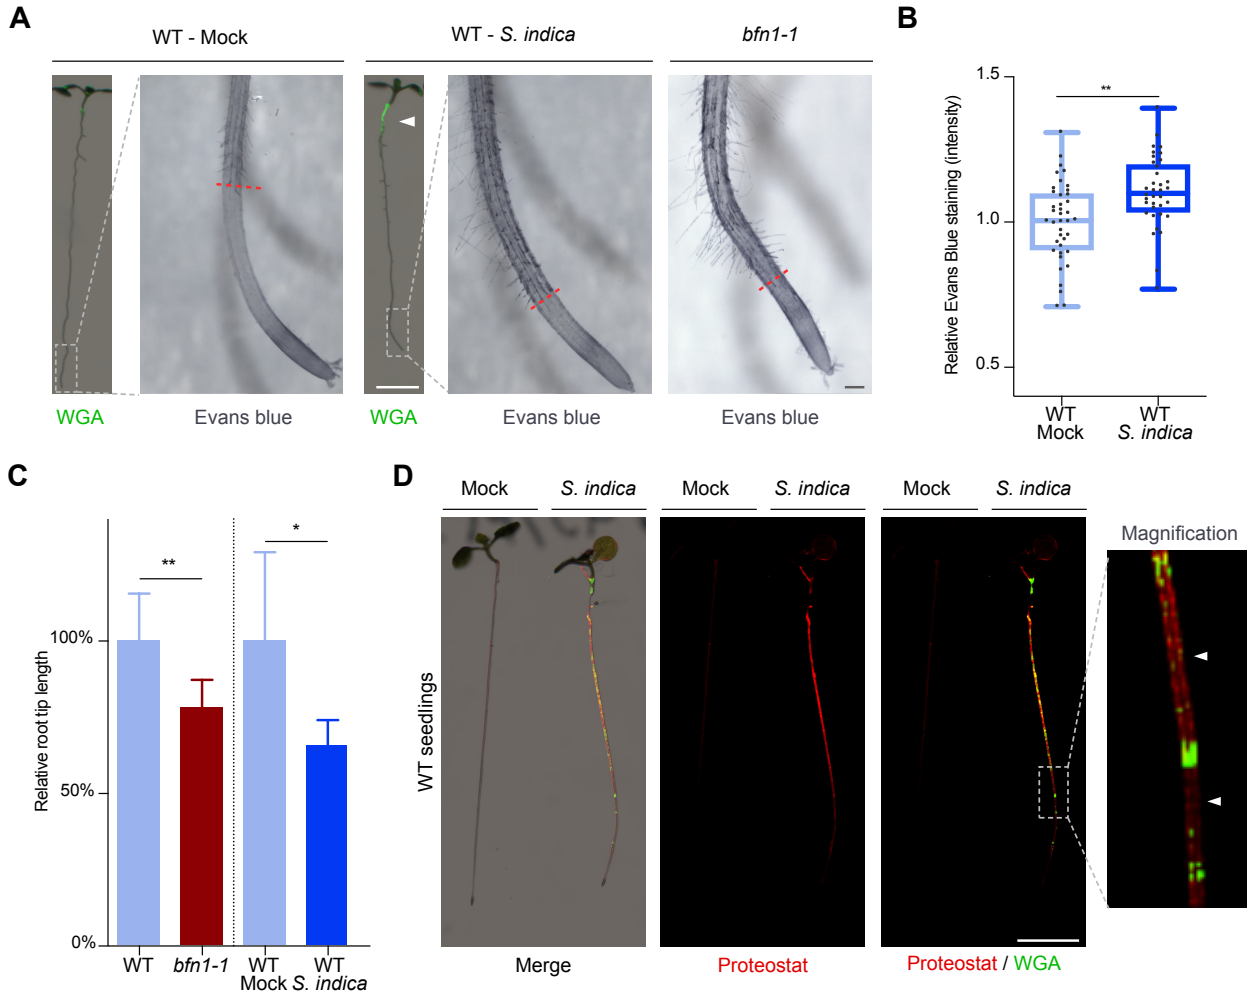

90

91 **Figure 6. *S. indica* causes a systemic cell death response in the root differentiation**  
 92 **zone.** (A) Comparison between *S. indica*-inoculated WT roots and *bfn1-1*. Representative  
 93 images show whole plant scans taken with LI-COR and microscopy overviews of the root  
 94 tip. The LI-COR scans of fungal mycelium stained with WGA-AF 488 show a preference  
 95 for the mature differentiation zone for fungal colonization, indicated by a white arrowhead.  
 96 Scale bar indicates 5 mm. Evans blue cell death staining in WT-mock, WT-colonized, and  
 97 *bfn1-1* roots highlights a pattern of dead cells in the *bfn1-1* mutant and *S. indica*-colonized  
 98 WT at the onset of the differentiated tissue as indicated with dotted red lines. Scale bar  
 99 indicates 100  $\mu$ m. (B) Quantification of *S. indica* induced cell death in WT Arabidopsis,  
 100 measuring relative Evans blue staining intensity. 10 plants at 6dpi were used, taking 4  
 101 images along the main root of each plant. Statistical evaluation was performed with a two-  
 102 tailed Student's t test for unpaired samples (\*\* $P = 0.0011$ ). (C) To determine relative root  
 103 tip length in WT Arabidopsis, *bfn1-1* mutant and *S. indica*-colonized WT plants, the  
 104 distance from the tip of the root to the first root hair, representing the start of the  
 105 differentiation zone was measured. For this analysis 2 different datasets were analyzed,  
 106 the first one representing 10 14-day-old WT and *bfn1-1* plants and the second showing 6  
 107 *S. indica*-colonized WT plants and their mock counterpart at 12dpi. For both datasets, WT  
 108 mock was set to 100% root length. Statistical evaluation was performed by two-tailed  
 109 Student's t test for unpaired samples (\*\* $P < 0.0012$  for *bfn1-1* and \* $P = 0.033$  for *S. indica*-

110 inoculated WT). (D) Representative Proteostat images of *S. indica*-colonized WT roots.  
111 Magnification panel shows Proteostat staining in zones of the root where *S. indica* is not  
112 present (white arrowheads). Scale indicates 5 mm.

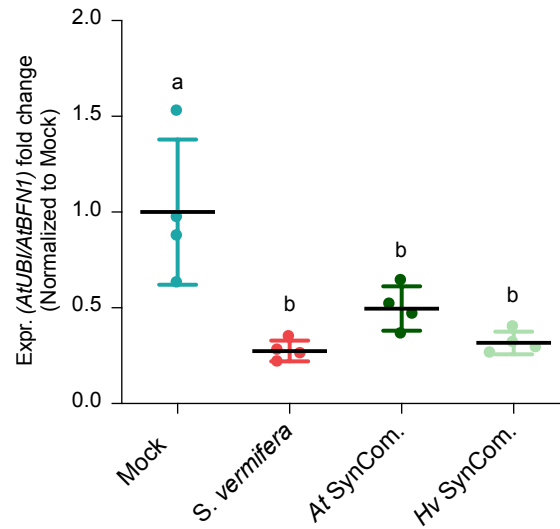

113

114 **Figure 7. *BFN1* is downregulated during colonization by beneficial microbes.** qRT-  
115 PCR shows downregulation of *BFN1* in *A. thaliana* (*At*) during colonization by *S. vermifera*  
116 and the *H. vulgare* (*Hv*) and *A. thaliana* bacterial SynComs. RNA was harvested from 4  
117 replicates at 6 dpi using 30 plants per replicate for each treatment. *BFN1* expression  
118 levels are normalized to mock conditions. Statistical evaluation was performed via one-  
119 way ANOVA and Tukey's post hoc test before normalization (significance threshold:  $P$   
120  $\leq 0.05$ ).



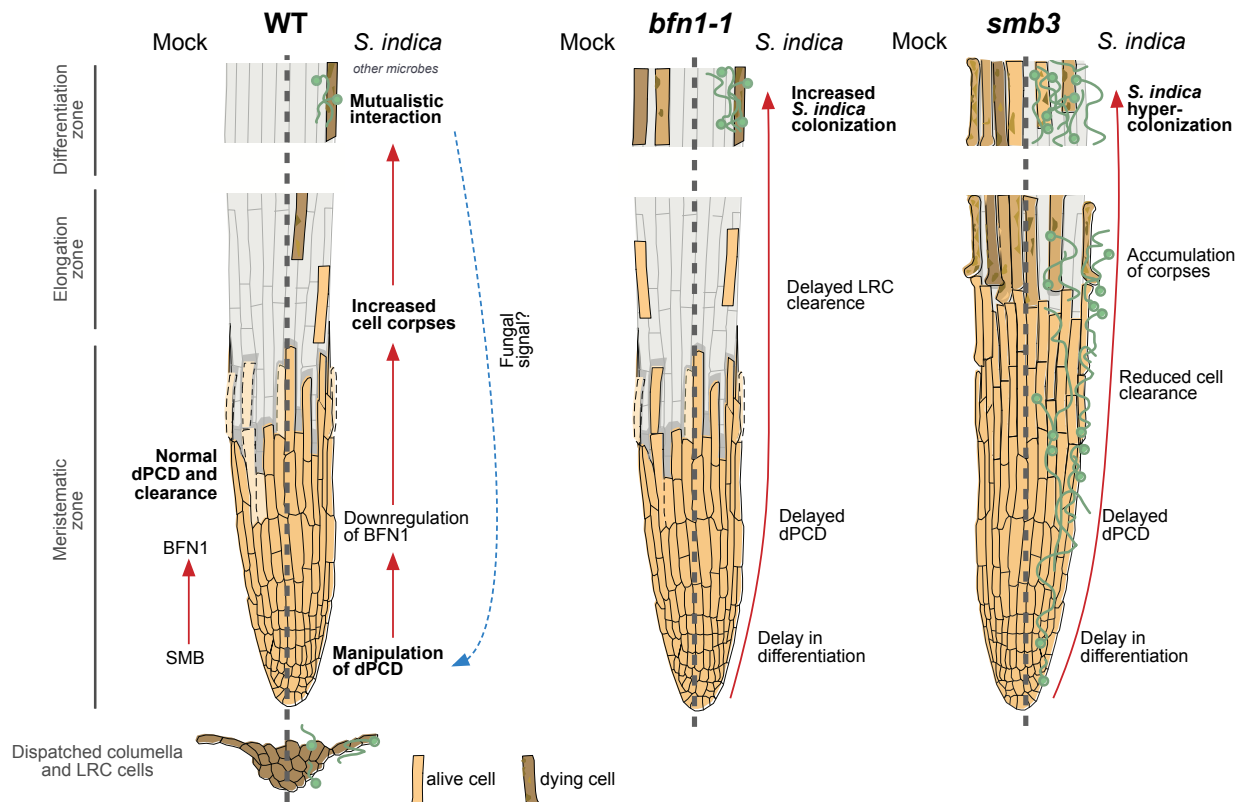

121

122

123

124

125

126

127

128

129

130

131

132

133

134

135

136

137

138

139

140

141

**Figure 8. Proposed models for manipulation of dPCD and implications for the interaction with *S. indica*.** The size of the root cap organ in Arabidopsis is maintained by high cell turnover of root cap cells and cell corpse clearance. While the columella root cap is shed from the root tip, a dPCD machinery marks the final step of LRC differentiation and prevents LRC cells from entering the elongation zone. Induction of cell death by the transcription factor SMB is followed by irreversible DNA fragmentation and cell corpse clearance, mediated by the nuclease BFN1, a downstream component of dPCD (Fendrych et al., 2014). The absence of dPCD induction in the *smb3* knockout mutant leads to a delay in LRC differentiation and allows LRC cells to enter the elongation zone, where they die uncontrolled and remain attached to the root as dying cells or cell corpses. The *smb3* phenotype results in hypercolonization of Arabidopsis by *S. indica*, as the fungus colonizes the entire root from the root tip to the differentiation zone and is not restricted to the differentiation zone as is the WT Arabidopsis roots. *S. indica* is capable of clearing the LRC cell corpses on *smb3*. During colonization, *S. indica* downregulates *BFN1* in Arabidopsis WT roots. We hypothesize that this leads to a reduced rate of cell corpse clearance in the root cap, which is beneficial for fungal colonization through increased nutrient availability in the form of dying LRC cells. Interestingly, the cell death pattern of *bfn1-1* mock roots and WT colonized roots are similar, indicating the importance of *BFN1* downregulation to manipulate plant dPCD pathways during plant-microbe interactions.
